# Supplementary material for: Structural basis of Lewisb antigen binding by the Helicobacter pylori adhesin BabA
Source: PubMed Central journal article supplement (PMC4643811; doi:10.1126/sciadv.1500315), 2015-08-14
Supplement: 1500315_SM.pdf [file 1500315_SM.pdf]

## Supplementary Materials for **Structural basis of Lewis<sup>b</sup> antigen binding by the *Helicobacter pylori* adhesin BabA**

Naim Hage, Tina Howard, Chris Phillips, Claire Brassington, Ross Overman, Judit Debreczeni,  
Paul Gellert, Snow Stolnik, G. Sebastiaan Winkler, Franco H. Falcone

Published 14 August 2015, *Sci. Adv.* **1**, e1500315 (2015)

DOI: 10.1126/sciadv.1500315

### **This PDF file includes:**

#### Materials and Methods

Fig. S1. Glycan symbolic representations of the fucosylated histo-blood group antigens that act as BabA receptors.

Fig. S2. Schematic illustration of the predicted domain structure of BabA.

Fig. S3. Alignment of BabA J99 and SabA 26695 protein sequences annotated with secondary structure elements.

Fig. S4. Superimposition of BabA from apo and cocrystal structures.

Fig. S5. Secondary structure and thermal stability of BabA and BabA variants.

Fig. S6. Type 1 and type 2 fucosylated histo-blood group antigen molecular models.

Fig. S7. Rainbow representation of apo-BabA.

Table S1. X-ray diffraction data collection and refinement statistics.

Table S2. Thermodynamic parameters of BabA:Le<sup>b</sup> interaction at pH 4.5 and 7.4.

Table S3. Binding affinity of BabA to various histo-blood group antigens.

Table S4. Oligonucleotides used in BabA cloning and site-directed mutagenesis.

References (6, 22, 46, 47)

## **Supplementary Materials and Methods**

---

### **Secondary structure analysis**

Circular dichroism spectra of BabA and BabA variants (containing N206A and D233A/S244A substitutions) was measured using a J-810 Spectropolarimeter (Jasco). Protein concentration was 1  $\mu$ M in a buffer containing 20 mM Tris-Cl (pH 7.4) and 3 mM NaCl. Measurements were made at 25°C in a quartz cell with a 0.1 cm pathlength at a data pitch of 0.5 nm and scanning speed of 100 nm/min. Reported spectra are baseline-corrected for buffer alone and averaged from three independent scans.

### **Thermal stability analysis**

For differential scanning fluorimetry experiments, SYPRO Orange dye (20 $\times$  final concentration) was added to 10  $\mu$ M BabA and BabA variants (containing N206A and D233A/S244A substitutions) in a buffer containing 20 mM Tris-Cl (pH 7.4) and 300 mM NaCl. Changes in fluorescence were measured across an increasing temperature gradient from 25°C to 60°C using a LightCycler 480 II (Roche) at a ramp rate of 0.01°C/s. Primary data points from three independent experiments were fitted to a 6-parameter unfolding equation (46) using the Prism analysis package (GraphPad Software).

Supplementary Figures and Tables

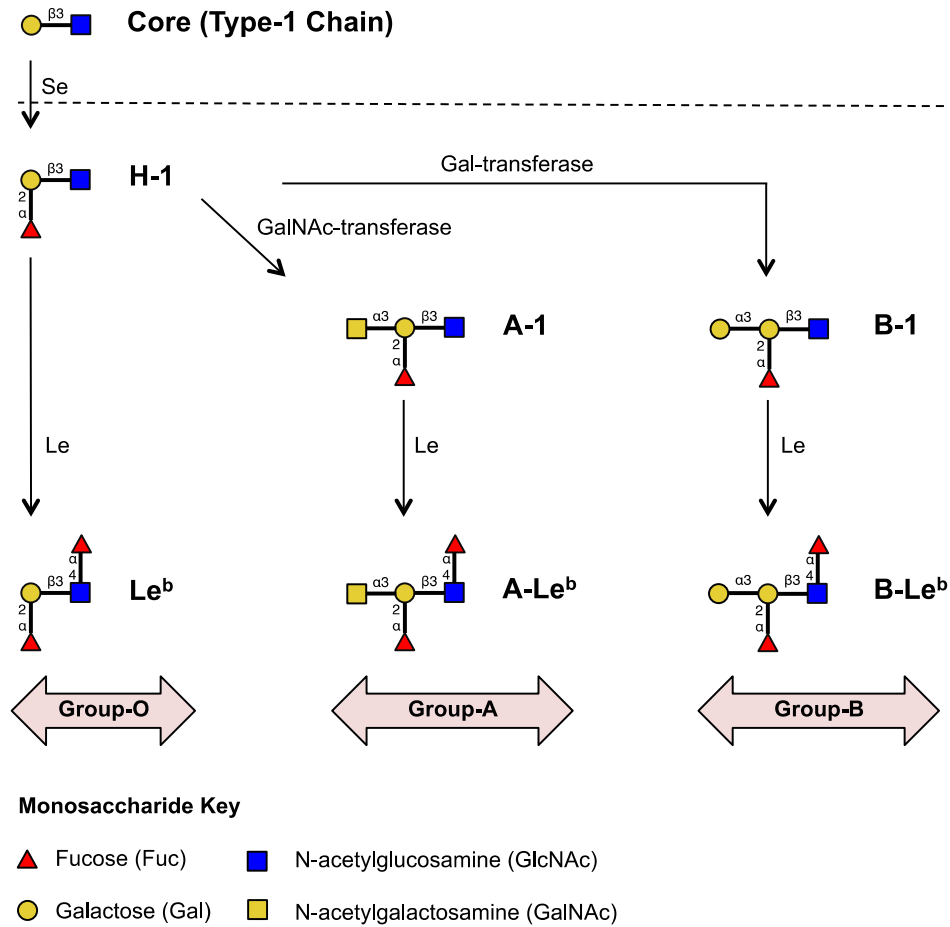

**Fig. S1. Glycan symbolic representations of the fucosylated histo-blood group antigens that act as BabA receptors.** The terminal glycan epitopes of the secreted ABH/Lewis antigens that act as receptors for BabA in the gastric mucosa are shown. Histo-blood group antigens are produced after the fucosylation of a type 1 lacto series core chain by an  $\alpha$ 1,2-fucosyltransferase (Se), which generates the H-1 antigen. This oligosaccharide is modified by a GalNAc-transferase in blood group A individuals and Gal-transferase in blood group B individuals, thereby producing the A-1 and B-1 antigens, respectively. All ABH antigens are subjected to further fucosylation by an  $\alpha$ 1,3/4-fucosyltransferase (Le), which produces Le<sup>b</sup>, A-Le<sup>b</sup> and B-Le<sup>b</sup> in blood group O, A and B individuals, respectively (6).

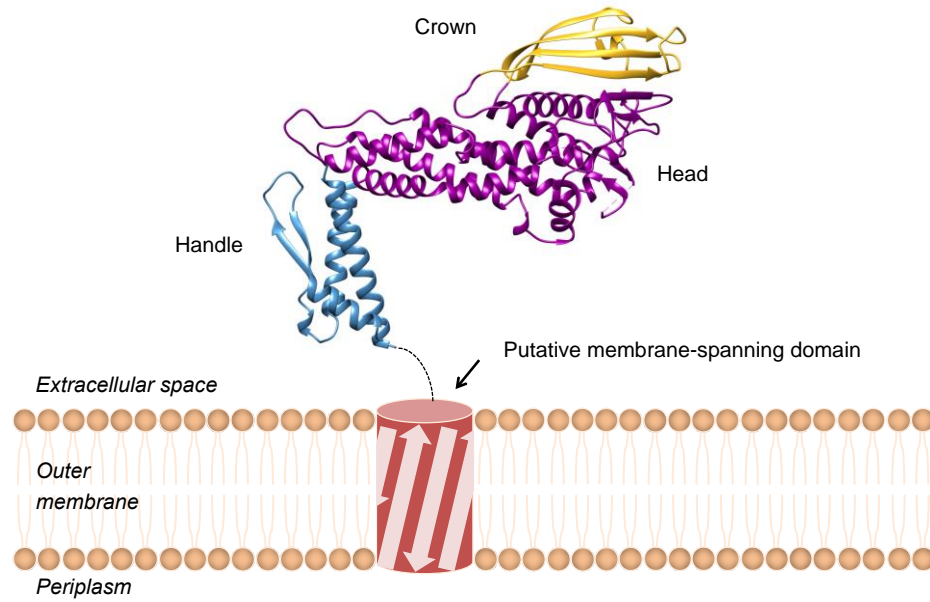

**Fig. S2. Schematic illustration of the predicted domain structure of BabA.** Indicated are the handle (blue) and head regions (dark magenta), and the crown  $\beta$ -strand unit (gold) of the extracellular domain. BabA is anchored to the *H. pylori* outer membrane through a putative C-terminal transmembrane  $\beta$ -barrel domain.







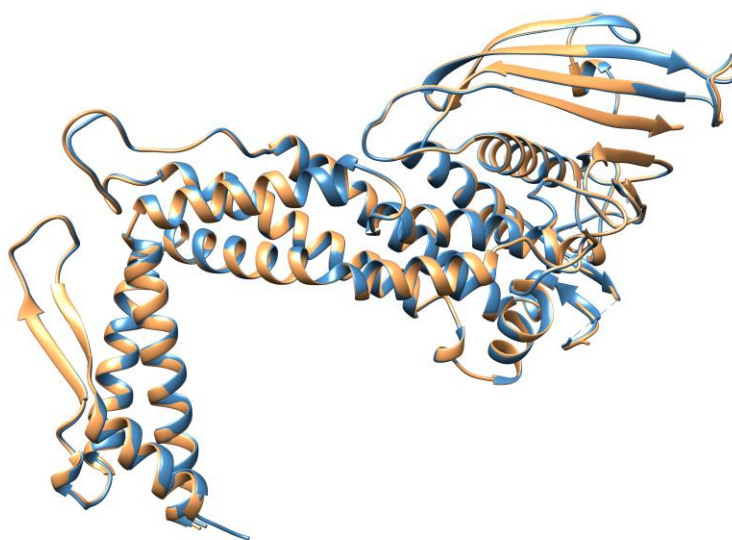

**Fig. S4. Superimposition of BabA from apo and cocrystal structures.** No global conformational change occurs in BabA (sandy brown) after Le<sup>b</sup> complex formation (steel blue) - RMSD = 0.25Å for all C $\alpha$  atoms (22).



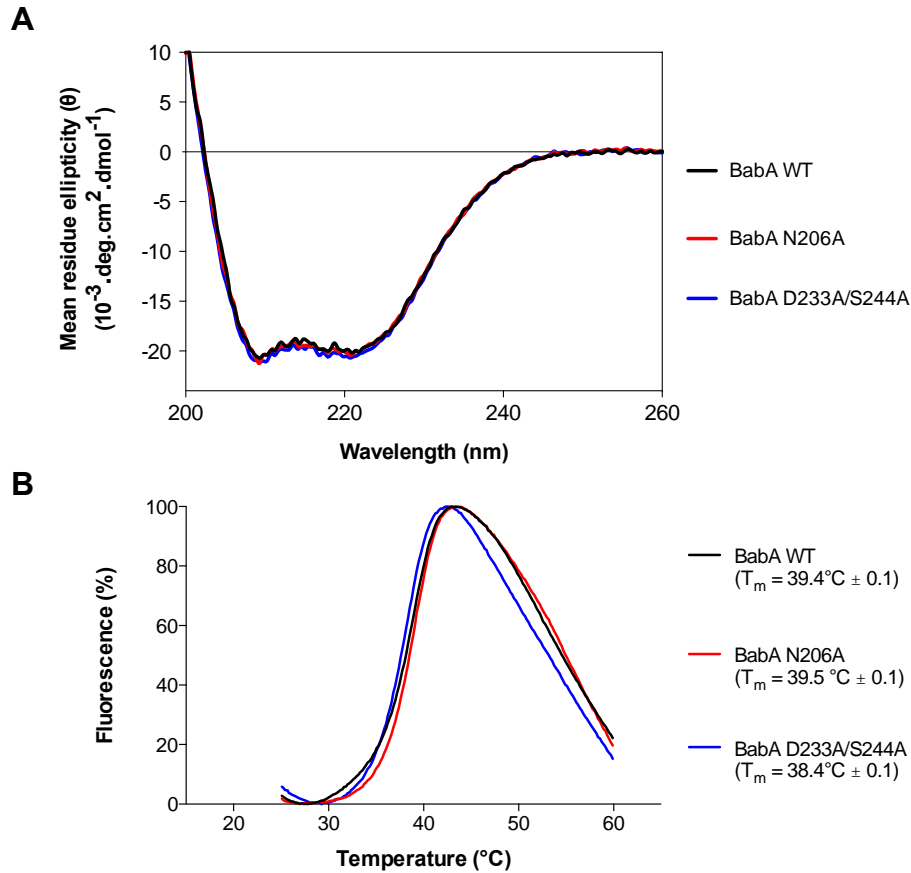

**Fig. S5. Secondary structure and thermal stability of BabA and BabA variants.** (A) Overlay of far-UV circular dichroism spectra averaged from three independent experiments. (B) Temperature-induced unfolding transition determined using differential scanning fluorimetry. The reported midpoint temperature of each protein unfolding transition ( $T_m$ ) is the average ( $\pm$  SEM) from three independent experiments.

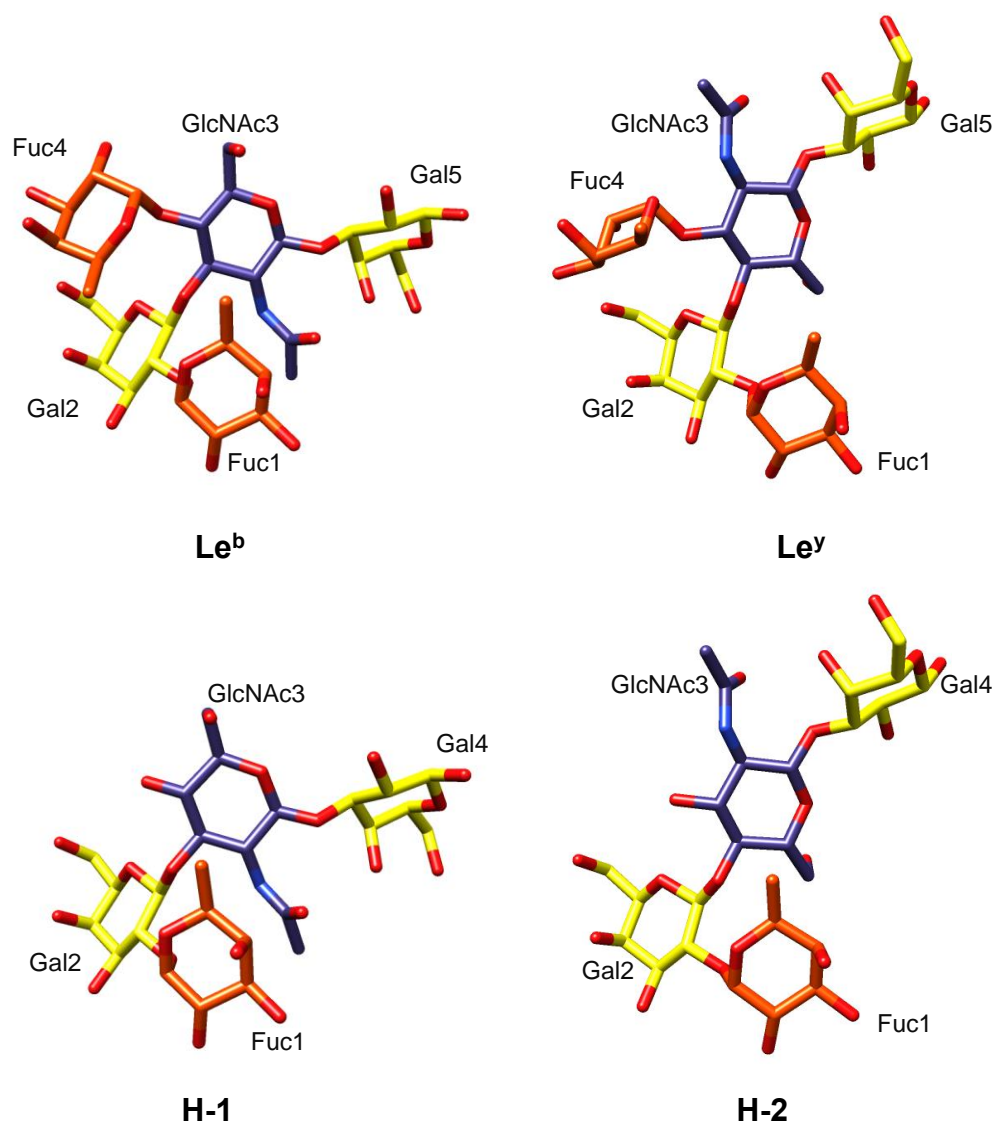

**Fig. S6. Type 1 and type 2 fucosylated histo-blood group antigen molecular models.** Stick models of Le<sup>b</sup> and H-1 (type 1) antigens show a distinctly different three-dimensional orientation to Le<sup>y</sup> and H-2 (type 2) antigens due to Gal $\beta$ 1-3GlcNAc and Gal $\beta$ 1-4GlcNAc linkages, respectively. Models were calculated in minimum energy conformations with the SWEET-II system (47). Fucose, galactose and *N*-acetylglucosamine residues are colored orange, yellow and blue, respectively.

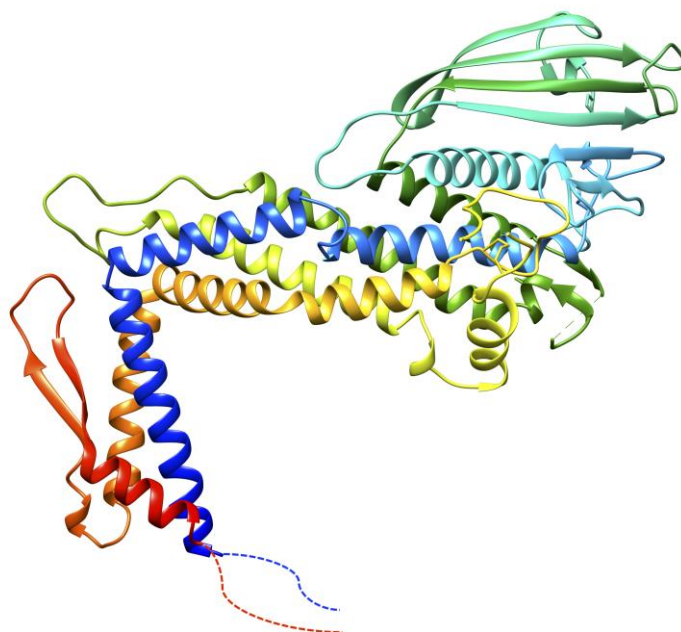

**Fig. S7. Rainbow representation of apo-BabA.** Recombinant BabA used in this study contains amino acids 10 to 527 of mature BabA followed by three C-terminal polypeptide tags (6xLys-c-Myc-6xHis). The residues visible in the apo-BabA electron density map run from 27-527. BabA amino acids 10-26 (blue dotted line) and the C-terminal polypeptide tags corresponding to amino acids 528-552 (red dotted line) were not modeled.

**Table S1. X-ray diffraction data collection and refinement statistics.**

| <b>Components</b>                                   | <b>SeMet BabA<br/>(SAD data collection)</b> | <b>BabA:Le<sup>b</sup></b> |
|-----------------------------------------------------|---------------------------------------------|----------------------------|
| <b>Data collection</b>                              |                                             |                            |
| Space group                                         | P 21 21 21                                  | P 21 21 21                 |
| Cell dimensions                                     |                                             |                            |
| <i>a, b, c</i> (Å)                                  | 60.83 93.04 96.92                           | 60.59 91.77 96.42          |
| <i>α, β, γ</i> (°)                                  | 90 90 90                                    | 90 90 90                   |
| Wavelength (Å)                                      | 0.97925 (PEAK)                              | 0.920                      |
| Resolution (Å)                                      | 48.46-1.91 (1.98-1.91)                      | 44.78-2.12 (2.18-2.12)     |
| <i>R</i> <sub>merge</sub> (all I+ and I-)           | 0.236 (3.427)                               | 0.141 (0.643)              |
| <i>I</i> / <i>σ</i> <i>I</i>                        | 13.2 (0.9)                                  | 11.8 (3.0)                 |
| Completeness (%)                                    | 98.7 (89.2)                                 | 99.1 (99.4)                |
| Multiplicity <sup>1</sup>                           | 23.1 (13.8)                                 | 6.6 (6.5)                  |
| <b>Refinement</b>                                   |                                             |                            |
| Resolution (Å)                                      | 48.46-1.91 (1.98-1.91)                      | 44.78-2.12 (2.18-2.12)     |
| No. reflections                                     | 39877 (96.7%)                               | 29319 (98.9%)              |
| <i>R</i> <sub>work</sub> / <i>R</i> <sub>free</sub> | 0.189/0.231 (0.378/0.331)                   | 0.171/0.223 (0.224/0.271)  |
| No. atoms                                           |                                             |                            |
| Protein                                             | 3662                                        | 3654                       |
| Ligand/ion                                          | -                                           | 57                         |
| Water                                               | 132                                         | 156                        |
| B-factors                                           |                                             |                            |
| Protein                                             | 25.327                                      | 20.97                      |
| Ligand/ion                                          |                                             | 35.413 (31.9) <sup>§</sup> |
| Water                                               | 34.124                                      | 30.034                     |
| R.m.s deviations                                    |                                             |                            |
| Bond lengths (Å)                                    | 0.0184                                      | 0.0165                     |
| Bond angles (°)                                     | 1.7756                                      | 1.726                      |

<sup>§</sup>Excluding the partially visible galactose (Gal5) moiety

**Table S2. Thermodynamic parameters of BabA:Le<sup>b</sup> interaction at pH 4.5 and 7.4.** The upper panels in each ITC trace show a representative calorimetric response obtained by titrating BabA with Le<sup>b</sup>. The lower panels depict the binding isotherm obtained where the continuous line represents the least-squares fit of the data to a single-site binding model. The reported thermodynamic parameters are the average ( $\pm$  SEM) of three independent experiments. There are no significant differences between the thermodynamic parameters and dissociation constants of BabA:Le<sup>b</sup> binding at pH 4.5 and 7.4 (unpaired two-tailed Welch's t-test,  $P > 0.05$ ).

| Thermodynamic parameters                                                                                                                                                                                                                  | ITC trace |
|-------------------------------------------------------------------------------------------------------------------------------------------------------------------------------------------------------------------------------------------|-----------|
| <p><b>pH = 4.5</b></p> <p><math>K_D = 227 \pm 22 \mu\text{M}</math></p> <p><math>N = 0.91 \pm 0.15</math></p> <p><math>\Delta H = -12.2 \pm 1.8 \text{ kcal/mol}</math></p> <p><math>-T\Delta S = 7.2 \pm 1.8 \text{ kcal/mol}</math></p> |           |
| <p><b>pH = 7.4</b></p> <p><math>K_D = 252 \pm 15 \mu\text{M}</math></p> <p><math>N = 1.07 \pm 0.03</math></p> <p><math>\Delta H = -10.9 \pm 0.5 \text{ kcal/mol}</math></p> <p><math>-T\Delta S = 6.0 \pm 0.5 \text{ kcal/mol}</math></p> |           |

**Table S3. Binding affinity of BabA to various histo-blood group antigens.** Glycan structural representations can be interpreted with the following key: fucose (Fuc, ▲), galactose (Gal, ●), *N*-acetylglucosamine (GlcNAc, ■), glucose (Glc, ●), *N*-acetylneuraminic acid (Neu5Ac, ◆). The upper panels in each ITC trace show a representative calorimetric response obtained by titrating BabA with the respective histo-blood group antigens. The lower panels depict the binding isotherm obtained where the continuous line represents the least-squares fit of the data to a single-site binding model (where applicable). Calorimetric titrations were performed at pH 7.4.

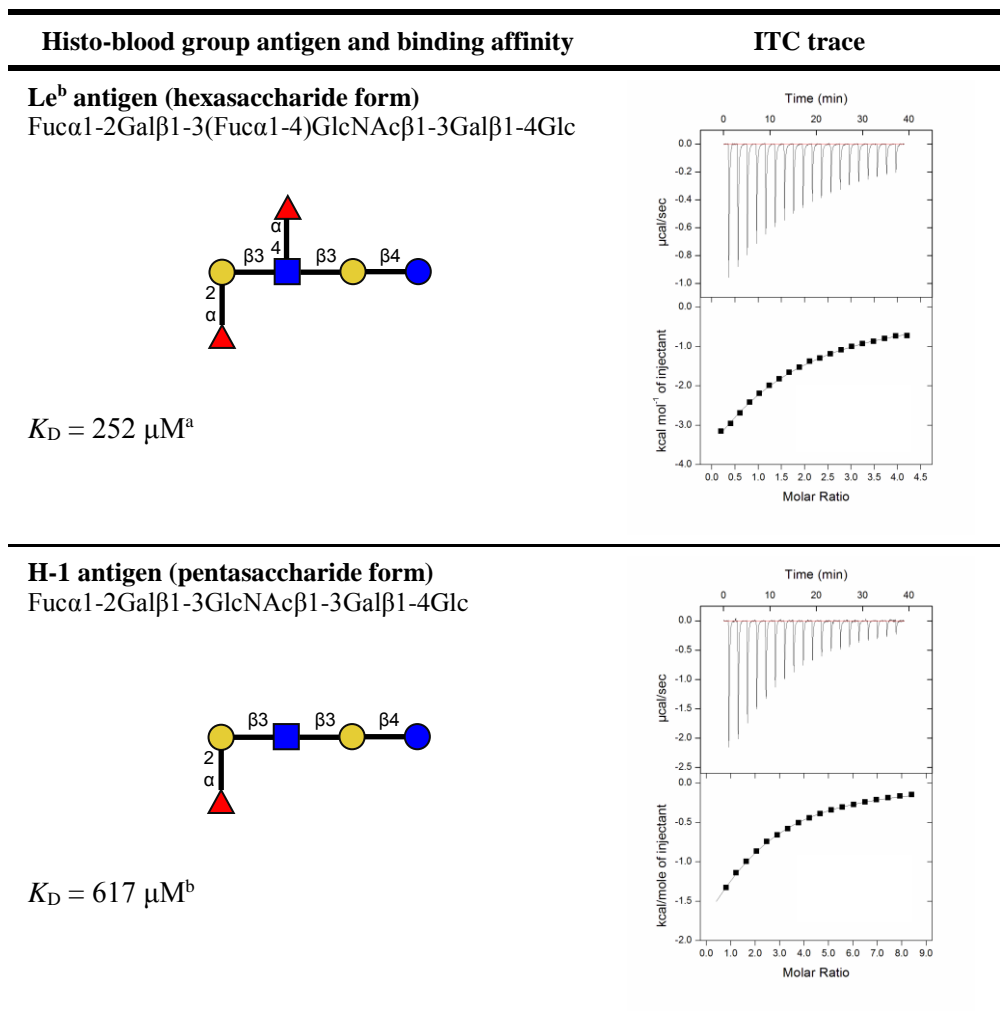

---

**Le<sup>a</sup> antigen (pentasaccharide form)**  
Gal $\beta$ 1-3(Fuca1-4)GlcNAc $\beta$ 1-3Gal $\beta$ 1-4Glc

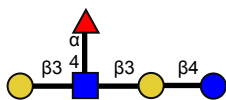

No binding detected

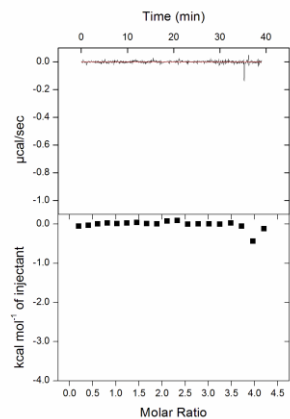

---

**Le<sup>y</sup> antigen (pentasaccharide form)**  
Fuca1-2Gal $\beta$ 1-4(Fuca1-3)GlcNAc $\beta$ 1-3Gal

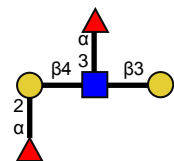

No binding detected

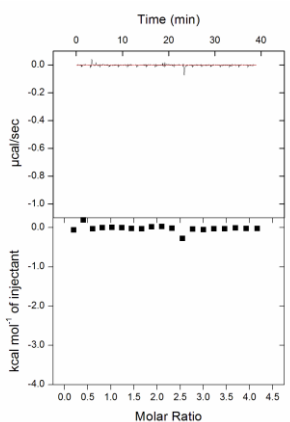

---

**H-2 antigen (tetrasaccharide form)**  
Fuca1-2Gal $\beta$ 1-4GlcNAc $\beta$ 1-3Gal

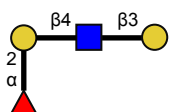

No binding detected

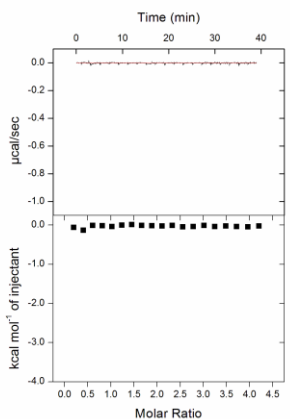

---

**SLe<sup>x</sup> antigen (pentasaccharide form)**  
Neu5Ac $\alpha$ 2-3Gal $\beta$ 1-4(Fuca1-3)GlcNAc $\beta$ 1-3Gal

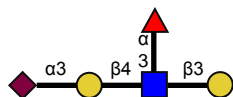

No binding detected

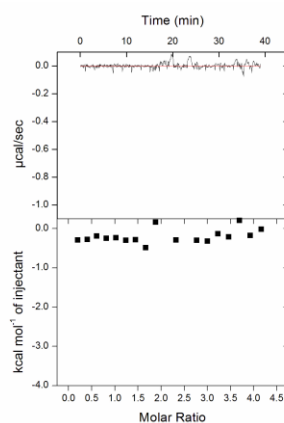

---

<sup>a</sup> Average of three independent experiments (SEM =  $\pm 15\mu\text{M}$ ).

<sup>b</sup> Average of two independent experiments (Range =  $\pm 45\mu\text{M}$ ).



**Table S4. Oligonucleotides used in BabA cloning and site-directed mutagenesis.** Where applicable, the recognition sites for the stated restriction enzymes are underlined. [FOR] and [REV] denote sense and antisense primers, respectively. [Phos] denotes a 5' phosphorylation.

| <b>Designation</b>        | <b>Sequence (5' – 3')</b>                           |
|---------------------------|-----------------------------------------------------|
| BabA [FOR] 1- NcoI        | TCGGATCCATGGAAGACGACGGCTTTTAC                       |
| BabA [REV] -527 BamHI     | TCTGCTGGATCCCTTCTTCTTCTTCTTCTTGAGTTCTTG<br>GTTGATGG |
| BabA D233A [FOR]          | [Phos]GTTCAAAAGTGGTTGCTAGTCGTGCAGATG                |
| BabA D233A [REV]          | [Phos]TGATCGTGGTGGTTACGCTTTTGCCGTCTATG              |
| BabA D233A/S244A<br>[FOR] | [Phos]GTAATACAACAGGGGTGGCCTACACCGAAATCA<br>C        |
| BabA D233A/S244A<br>[REV] | [Phos]CATCTGCACGACTAGCAACCACTTTTGAAC                |
| BabA N206A [FOR]          | [Phos]GAACCAAGACTAAAATCCAAACCATAGAC                 |
| BabA N206A [REV]          | [Phos]CGTCTTTTGTGAGCATTACACCTGTGAC                  |
